# Supplementary material for: Repression of TCF3/E2A contributes to Hodgkin lymphomagenesis
Source: PubMed Central journal article supplement (PMC5095044; doi:10.18632/oncotarget.9210), 2016-05-06
Supplement: oncotarget-07-36854-s001.pdf [file oncotarget-07-36854-s001.pdf]

SUPPLEMENTARY FIGURE

**A**

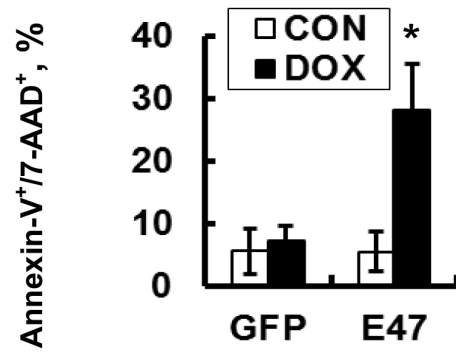

**B**

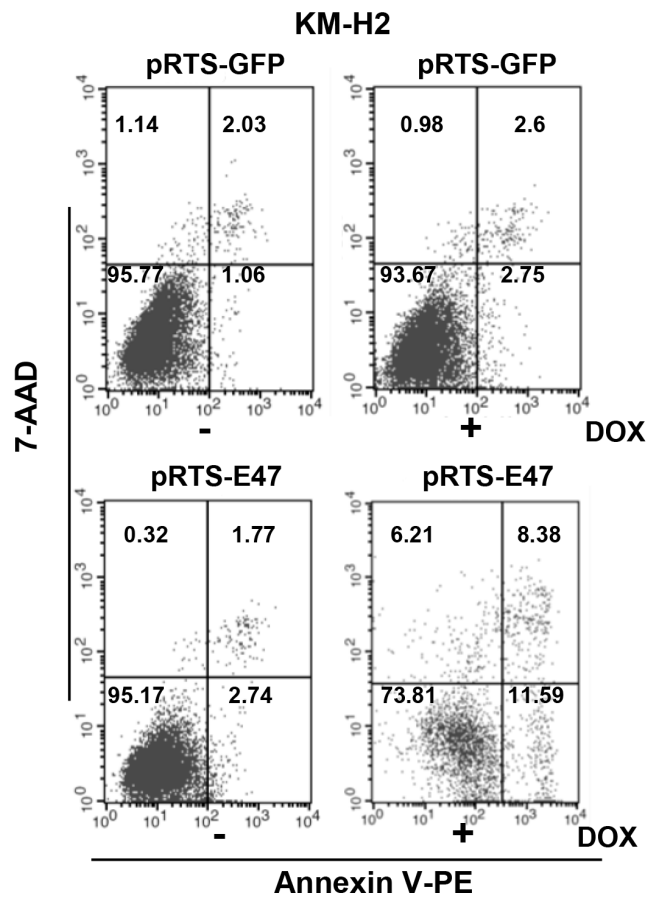

**Supplementary Figure S1:** A. E47 induces apoptosis in KM-H2-pRTS cell. KM-H2 cells stably expressing empty pRTS-GFP vector or pRTS-E47 were incubated in the presence of doxycycline (0.5 μg/mL) for 4 days. Cell death was measured with help of annexin V-PE/7-AAD staining. A representative one of three independent experiments yielding similar results is shown. \* p<0.05 as it was assessed by double sided T-test. B. A representative fluorescence plots of annexin-V/7-AAD staining.
